# Supplementary material for: Rh-Catalyzed reductive Mannich-type reaction and its application towards the synthesis of (±)-ezetimibe
Source: PubMed Central journal article supplement (PMC4979637; doi:10.3762/bjoc.12.157), 2016-07-27

# Rh-Catalyzed reductive Mannich-type reaction and its application towards the synthesis of ( $\pm$ )-ezetimibe

Motoyuki Isoda<sup>1</sup>, Kazuyuki Sato<sup>1</sup>, Yurika Kunugi<sup>1</sup>, Satsuki Tokonishi<sup>1</sup>, Atsushi Tarui<sup>1</sup>, Masaaki Omote\*<sup>1</sup>, Hideki Minami<sup>2</sup> and Akira Ando\*<sup>1</sup>

Address: <sup>1</sup>Faculty of Pharmaceutical Sciences, Setsunan University 45-1, Nagaotoge-cho, Hirakata, Osaka 573-0101, Japan and <sup>2</sup>Faculty of Pharmaceutical Sciences, Hiroshima International University, 5-1-1 Hirokoshingai, Kure, Hiroshima 737-0112, Japan

Email: Akira Ando\* - aando@pharm.setsunan.ac.jp; Masaaki Omote\* - omote@pharm.setsunan.ac.jp

\*Corresponding author

## Experimental details, characterization of the compounds, X-ray crystallographic analysis of *anti*-**3Ai**, and <sup>1</sup>H, <sup>13</sup>C NMR spectra

|                                                                                                                                                          |         |
|----------------------------------------------------------------------------------------------------------------------------------------------------------|---------|
| General information .....                                                                                                                                | S2      |
| Experimental section .....                                                                                                                               | S2      |
| Materials .....                                                                                                                                          | S2      |
| Typical procedure for the synthesis of <i>syn</i> -1-( <i>p</i> -methoxyphenyl)-<br>3-methyl-4-phenylazetidin-2-one ( <i>syn</i> - <b>3Aa</b> ) .....    | S2      |
| Typical procedure for the synthesis of <i>anti</i> -3-(3-hydroxypropyl)-<br>1-(4-methoxyphenyl)-4-phenylazetidin-2-one ( <i>anti</i> - <b>3Bh</b> )..... | S3      |
| Synthesis of 4-(4-(benzyloxy)phenyl)-1-(4-fluorophenyl)-3-<br>(3-(4-fluorophenyl)-3-hydroxypropyl)azetidin-2-one ( <b>3Bj</b> ).....                     | S3      |
| Synthesis of ( $\pm$ )-ezetimibe .....                                                                                                                   | S4      |
| Spectroscopic data .....                                                                                                                                 | S4–S7   |
| X-ray crystallographic analysis of <i>anti</i> - <b>4Ai</b> .....                                                                                        | S8–S9   |
| References .....                                                                                                                                         | S10     |
| <sup>1</sup> H NMR and <sup>13</sup> C NMR charts.....                                                                                                   | S11–S18 |

### General information:

$^1\text{H}$  NMR and  $^{13}\text{C}$  NMR spectra were recorded on JNM-GX400 spectrometers and ECZS-400 spectrometers.  $^{19}\text{F}$  NMR spectra were recorded on Hitachi FT-NMR R-90H spectrometers. Chemical shifts of  $^1\text{H}$  NMR and  $^{13}\text{C}$  NMR are reported in ppm from tetramethylsilane (TMS) as an internal standard. Chemical shifts of  $^{19}\text{F}$  NMR are reported in ppm from benzotrifluoride (BTF) as an internal standard. All data are reported with the chemical shift(s), relative integration value, multiplicity (s = singlet, d = doublet, t = triplet, q = quartet, br = broad, m = multiplet), and coupling constants (Hz). Mass spectra were obtained on JEOL JMS-700T spectrometers. IR spectra were recorded on a Hitachi 270-30 infrared spectrophotometer. Melting points were measured on a Yanagimoto micro melting point apparatus MP-S3. Analytical gas-liquid chromatography (GLC) was carried out on a Hitachi G-3500 gas chromatograph (column; TC-5 0.25 mm  $\times$  15 m, carrier; He). Peak areas were calculated on a Hitachi D-2500 Chromato-Integrator.  $^1\text{H}$  and  $^{13}\text{C}$  NMR spectra and characterization data for the compounds *syn*-/*anti*-**3Aa**, *syn*-**3Ad** and *anti*-**3Ah** are found in reference [1].

### Experimental section:

#### Materials

Tetrahydrofuran (THF) was purchased from Kanto Chemical Co. Inc. (Tokyo, Japan) in the dehydrated form. *N,N*-Dimethylformamide (DMF) and dichloromethane ( $\text{CH}_2\text{Cl}_2$ ) were distilled over  $\text{CaH}_2$  and phosphorus pentoxide just before use, respectively. All imines were prepared from corresponding aldehydes and amines. Methyl acrylate was distilled just before use. Other commercially available reagents were used without further purification. All experiments were carried out under an argon atmosphere in flame-dried glassware using standard inert techniques for introducing reagents and solvents unless otherwise noted.

#### Typical procedure for the synthesis of *syn*-1-(*p*-methoxyphenyl)-3-methyl-4-phenyl-azetidin-2-one (*syn*-**3Aa**)

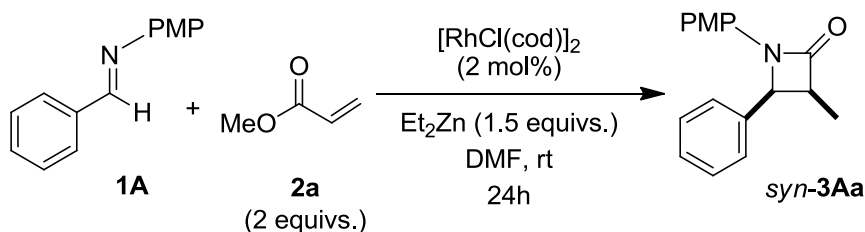

In a manner closely related to a procedure in reference [1]: (*E*)-*N*-benzylidene-4-methoxybenzenamine (**1A**, 0.5 mmol) and methyl acrylate (**2a**, 1 mmol) was added to a solution of  $[\text{RhCl}(\text{cod})]_2$  (2 mol %) in DMF (1.25 mL) at 0 °C. Then, 1.0 M  $\text{Et}_2\text{Zn}$  in hexane (1.5 mmol, 1.5 mL) was gradually added to the mixture at room temperature, and the mixture was stirred

at same temperature for 24 h. The mixture was quenched with sat.  $\text{NH}_4\text{Cl}$  and extracted with AcOEt. The AcOEt layer was washed with sat. NaCl and dried over  $\text{MgSO}_4$ . The solvent was removed in vacuo, and the residue was purified by column chromatography (AcOEt/hexane = 2:8) and the diastereomers were obtained in 69% (92.4 mg; *syn* form) and 9% yield (11.5 mg; *anti* form), respectively. The stereochemistry of products were determined by NOE between the  $\text{CH}_3$  and  $\text{C}_6\text{H}_5$  groups on azetidin-2-one ring and coupling constant between each protons of C3 and C4 (*syn* form:  $J = 5.0\text{--}6.0$  Hz, *anti* form:  $J = 2.0\text{--}3.0$  Hz) [2].

### Typical procedure for the synthesis of *anti*-3-(3-hydroxypropyl)-1-(4-methoxyphenyl)-4-phenylazetidin-2-one (*anti*-3Bh)

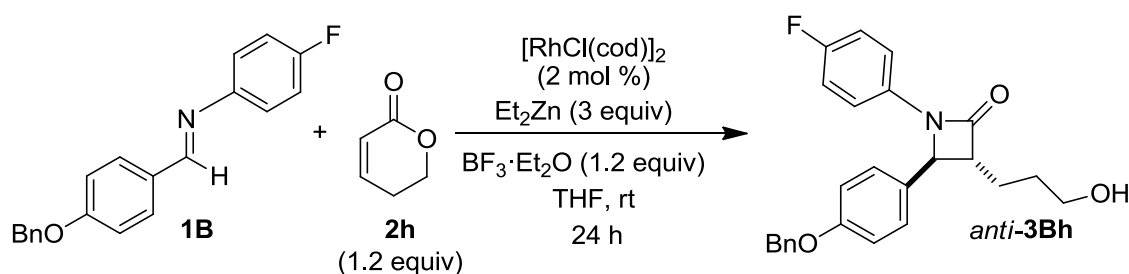

To a solution of  $[\text{RhCl}(\text{cod})]_2$  (2 mol %) and *N*-(4-(benzyloxy)benzylidene)-4-fluoroaniline (**1B**, 0.5 mmol) in THF (1.25 mL) at room temperature was added  $\text{BF}_3 \cdot \text{Et}_2\text{O}$  (0.6 mmol), and then it stirred for 30 min at the same temperature. Subsequently, 5,6-dihydro-2*H*-pyran-2-one (**2h**, 0.6 mmol) was added to the suspension mixture, and then 1.0 M  $\text{Et}_2\text{Zn}$  in hexane (1.5 mmol, 1.5 mL) was gradually added to the mixture and stirred for 24 h. The mixture was quenched with sat.  $\text{NH}_4\text{Cl}$  and extracted with AcOEt. The AcOEt layer was washed with sat. NaCl and dried over  $\text{MgSO}_4$ . The solvent was removed in vacuo, and the residue was purified by column chromatography (AcOEt/hexane = 4:6) and *anti* diastereomer was obtained in 46% (93.3 mg) [2].

### Synthesis of 4-(4-(benzyloxy)phenyl)-1-(4-fluorophenyl)-3-(3-(4-fluorophenyl)-3-hydroxypropyl)azetidin-2-one (3Bj)

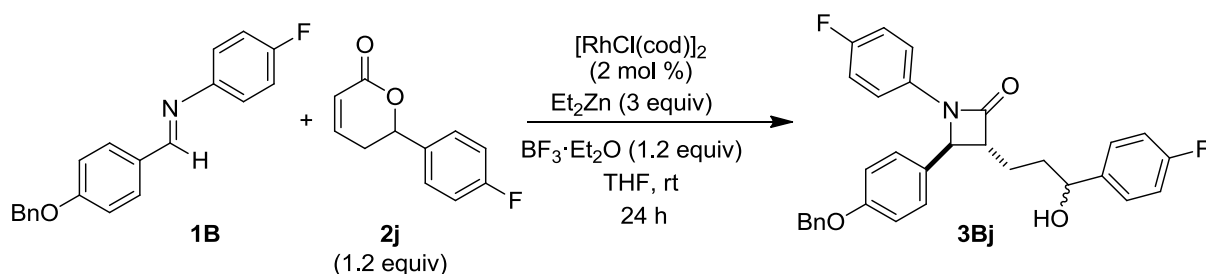

To a solution of  $[\text{RhCl}(\text{cod})]_2$  (2 mol %) and *N*-(4-(benzyloxy)benzylidene)-4-fluoroaniline (**1B**, 0.5 mmol) in THF (1.25 mL) at room temperature was added  $\text{BF}_3 \cdot \text{Et}_2\text{O}$  (0.6 mmol) was added to the mixture, and then it stirred for 30 min at the same temperature. Subsequently, 6-(4-fluorophenyl)-5,6-dihydro-2*H*-pyran-2-one (**2j**, 0.6 mmol) was added to the suspension

mixture, and then 1.0 M Et<sub>2</sub>Zn in hexane (1.5 mmol, 1.5 mL) was gradually added to the mixture and stirred for 24 h. The mixture was quenched with sat. NH<sub>4</sub>Cl and extracted with AcOEt. The AcOEt layer was washed with sat. NaCl and dried over MgSO<sub>4</sub>. The solvent was removed in vacuo, and the residue was purified by column chromatography (AcOEt/hexane = 5:5) to give **3Bj** in 58% (144.9 mg).

### Synthesis of (±)-ezetimibe

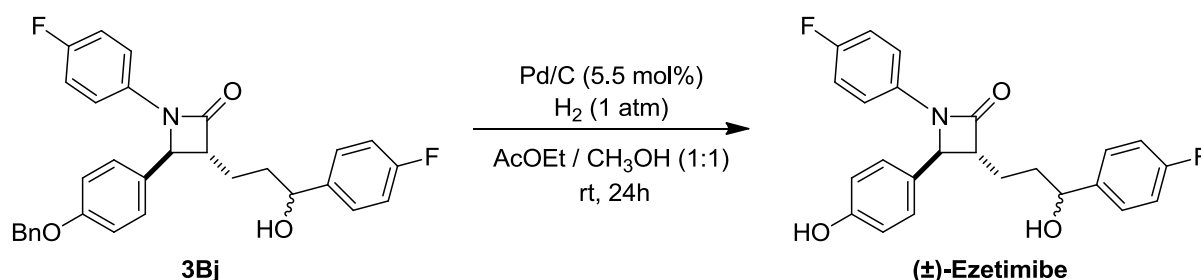

To a suspension of 10% Pd/C (5.5 mol %) in 1:1 AcOEt/CH<sub>3</sub>OH (10 mL) was added **3Bj** (0.2 mmol), and then it placed under H<sub>2</sub> (1 atm) for 24 h. Then the mixture was filtered, and the solvent was removed in vacuo. The residue was purified by column chromatography (AcOEt/hexane = 5:5) to give (±)-ezetimibe in 80% (65.5 mg).

### Spectroscopic Data:

#### 3-Benzyl-1-(4-methoxyphenyl)-4-phenylazetidin-2-one (3Ab)

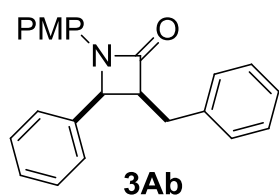

The title product (**3Ab**) was purified by column chromatography (AcOEt/hexane = 2:8) and only the *syn* diastereomer was obtained in 66% yield (113.5 mg).

*syn*-**3Ab**: A colorless solid; M.p. 140.0–140.5 °C; <sup>1</sup>H NMR (CDCl<sub>3</sub>) δ: 2.46 (1H, dd, *J* = 15.2, 10.0 Hz), 2.98 (1H, dd, *J* = 15.2, 5.2 Hz), 3.73 (3H, s), 3.90 (1H, dt, *J* = 15.2, 5.2 Hz), 5.15 (1H, d, *J* = 5.2 Hz), 6.74–6.80 (4H, m), 7.10–7.18 (4H, m), 7.22–7.26 (3H, m), 7.30–7.35 (3H, m); <sup>13</sup>C NMR (100 MHz, CDCl<sub>3</sub>) δ: 31.1, 55.5, 55.7, 58.7, 114.4, 118.5, 126.2, 127.6, 128.3, 128.5, 128.6, 128.7, 131.2, 134.8, 138.4, 156.0, 166.7; MS *m/z*: 343 (M<sup>+</sup>); HRMS Calcd. for C<sub>23</sub>H<sub>21</sub>NO<sub>2</sub>: 343.157 (M<sup>+</sup>), Found: 343.157; IR (KBr) cm<sup>-1</sup>: 1722.

#### 1-(4-Methoxyphenyl)-3,3-dimethyl-4-phenylazetidin-2-one (3Ae)

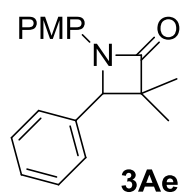

The title product (**3Ae**) was purified by column chromatography (AcOEt/hexane = 2:8) and was obtained in 98% yield (137.2 mg).

**3Ae**: A colorless solid; M.p. 146.5–147.0 °C; <sup>1</sup>H NMR (CDCl<sub>3</sub>) δ: 0.83 (3H, s), 1.51 (3H, s), 3.14 (3H, s), 4.76 (1H, s), 6.77–6.81 (2H, m), 7.17–7.20 (2H, m), 7.23–7.36 (4H, m); <sup>13</sup>C NMR (100 MHz, CDCl<sub>3</sub>) δ: 18.1, 22.9, 55.5, 55.6,

66.7, 114.4, 118.6, 126.7, 128.1, 128.7, 131.6, 135.8, 155.9, 171.0 ; MS  $m/z$ : 281 ( $M^+$ ); HRMS Calcd. for  $C_{18}H_{19}NO_2$ : 281.142 ( $M^+$ ), Found: 281.142; IR (KBr)  $cm^{-1}$ : 1731.

### **3-(But-1-enyl)-1-(4-methoxyphenyl)-4-phenylazetidin-2-one (3Ag)**

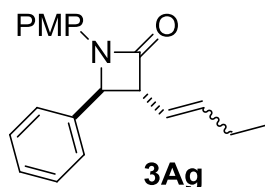

The title product (**3Ag**) was purified by column chromatography (AcOEt/hexane = 2:8) and was obtained in 59% yield (90.0 mg) as *anti* product of (*E/Z*)-mixture.

(*E/Z*)-*anti*-**3Ag**: A colorless viscous oil;  $^1H$  NMR ( $CDCl_3$ )  $\delta$ : 0.93 (0.3H, t,  $J = 7.2$  Hz), 1.01 (3H, t,  $J = 7.2$ ), 1.92–2.04 (0.2H, m), 2.06–2.13 (2H, m), 3.64–3.67 (1H, m), 3.73 (1.1H, m), 3.93–3.96 (0.1H, m), 4.67 (0.1H, d,  $J = 2.8$  Hz), 4.70 (1H, d,  $J = 2.4$  Hz), 5.57–5.66 (1.1H, m), 5.70–5.84 (1.1H, m), 6.75–6.79 (2.2H, m), 7.20–7.25 (2.2H, m), 7.29–7.38 (5.5H, m);  $^{13}C$  NMR (100 MHz,  $CDCl_3$ )  $\delta$ : 13.3, 14.3, 21.5, 22.7, 25.7, 55.1, 59.3, 62.0, 62.2, 63.6, 114.4, 118.38, 118.43, 121.3, 121.4, 125.9, 126.0, 128.5, 129.2, 131.4, 137.8, 138.1, 138.2, 156.1, 165.8; MS  $m/z$ : 307 ( $M^+$ ); HRMS Calcd. for  $C_{20}H_{21}NO_2$ : 307.157 ( $M^+$ ), Found: 307.157.

### **3-(4-Methoxyphenylamino)-*N,N*,2-trimethyl-3-phenylpropanamide (4Ai)**

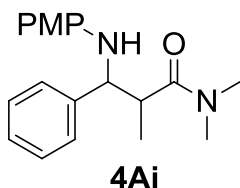

The title product (**4Ai**) was purified by column chromatography (AcOEt/hexane = 4:6) and each diastereomers were obtained in 5% (7.8 mg; *syn* form) and 22% yield (34.9 mg; *anti* form), respectively.

*syn*-**4Ai**: A colorless solid; M.p. 180.0–182.0;  $^1H$  NMR ( $CDCl_3$ )  $\delta$ : 1.34 (3H, d,  $J = 6.8$  Hz), 2.37 (3H, s), 2.78 (3H, s), 3.20–3.26 (1H, m), 3.66 (3H, s), 4.42 (1H, d,  $J = 4.0$  Hz), 5.65 (1H, br), 6.41–6.45 (2H, m), 6.62–7.66 (2H, m), 7.17–7.22 (1H, m), 7.24–7.30 (4H, m);  $^{13}C$  NMR (100 MHz,  $CDCl_3$ )  $\delta$ : 16.9, 35.5, 37.1, 41.1, 55.9, 61.9, 113.9, 114.9, 126.5, 127.3, 128.6, 141.8, 143.2, 151.3, 174.6; MS  $m/z$ : 312 ( $M^+$ ); HRMS Calcd. for  $C_{19}H_{24}N_2O_2$ : 312.184 ( $M^+$ ), Found: 312.184; IR (KBr)  $cm^{-1}$ : 3357, 1633.

*anti*-**4Ai**: A colorless solid; M.p. 119.5–120.5  $^{\circ}C$ ;  $^1H$  NMR ( $CDCl_3$ )  $\delta$ : 1.14 (3H, d,  $J = 6.8$  Hz), 1.56 (1H, s), 2.86 (3H, s), 2.95 (3H, s), 3.07–3.13 (1H, m), 3.66 (3H, s), 4.40 (1H, d,  $J = 5.2$  Hz), 4.64 (1H, br), 6.41–6.45 (2H, m), 6.62–6.66 (2H, m), 7.20–7.40 (5H, m);  $^{13}C$  NMR (100 MHz,  $CDCl_3$ )  $\delta$ : 12.4, 35.8, 37.4, 42.1, 55.8, 60.6, 114.7, 115.2, 126.9, 127.3, 128.6, 142.1, 142.1, 152.1, 174.7; MS  $m/z$ : 312 ( $M^+$ ); HRMS Calcd. for  $C_{19}H_{24}N_2O_2$ : 312.184 ( $M^+$ ), Found 312.184; IR (KBr)  $cm^{-1}$ : 3350, 1633.

### 3-(3-Hydroxypropyl)-1-(*p*-methoxyphenyl)-4-phenylazetidin-2-one (3Bh)

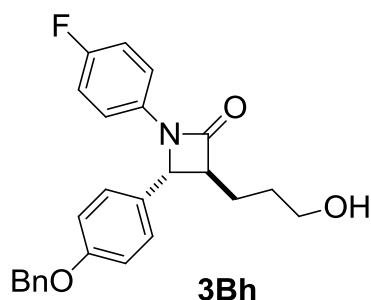

The title product (**3Bh**) was purified by column chromatography (AcOEt/hexane = 4:6) and only the *anti* diastereomer was obtained in 46% (93.3 mg).

*anti*-**3Bh**: A colorless solid; M.p. 75.5–76.0 °C; <sup>1</sup>H NMR (CDCl<sub>3</sub>) δ: 1.70–2.05 (5H, m), 3.10 (1H, td, *J* = 8.0, 2.4 Hz), 3.68 (2H, t, *J* = 6.4 Hz), 4.56 (1H, d, *J* = 2.4 Hz), 5.04 (2H, s), 6.89–6.98 (4H, m), 7.21–7.27 (4H, m), 7.30–7.42 (5H, m); <sup>13</sup>C NMR (100 MHz, CDCl<sub>3</sub>) δ: 25.3, 30.4, 60.5, 61.3, 62.2, 70.2, 115.6, 115.9 (d, *J* = 9 Hz), 118.5 (d, *J* = 22 Hz), 127.3, 127.6, 128.2, 128.7, 129.7, 134.0, 136.7, 159.1 (d, *J* = 243 Hz), 159.2, 168.0; <sup>19</sup>F NMR (CDCl<sub>3</sub>, 376 MHz) δ: -55.4 (1F, m); MS *m/z*: 405 (M<sup>+</sup>); HRMS Calcd. for C<sub>25</sub>H<sub>24</sub>FNO<sub>3</sub>: 405.174 (M<sup>+</sup>), Found: 405.174; IR (KBr) cm<sup>-1</sup>: 3392, 1732.

### 4-(4-(Benzyloxy)phenyl)-1-(4-fluorophenyl)-3-(3-(4-fluorophenyl)-3-hydroxypropyl)azetidin-2-one (3Bj)

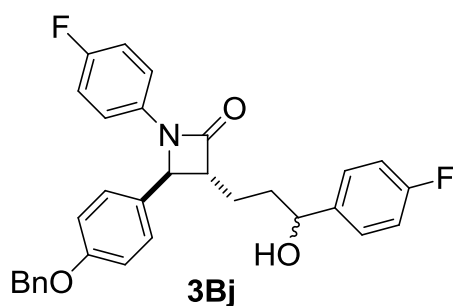

The title product (**3Bj**) was purified by column chromatography (AcOEt/hexane = 5:5) to give *anti*-**3Bj** in 58% (144.9 mg) as a diastereomeric mixture.

*anti*-**3Bj**: A colorless oil; <sup>1</sup>H NMR (CDCl<sub>3</sub>) δ: 1.79–2.06 (4H, m), 2.31 (1H, br), 3.04–3.13 (1H, m), 4.51–4.57 (1H, m), 4.70 (1H, m), 5.04 (2H, s), 6.88–7.04 (6H, m), 7.19–7.42 (11H, m); <sup>13</sup>C NMR (100 MHz, CDCl<sub>3</sub>) δ: 25.1, 36.6, 36.7, 60.4, 60.4, 61.2, 70.2, 73.2, 73.4, 115.4 (d, *J* = 22.1 Hz), 115.5 (d, *J* = 21.1 Hz), 115.6, 115.9 (d, *J* = 23.0 Hz), 118.5 (d, *J* = 8.5 Hz), 127.3, 127.4 (d, *J* = 22.0 Hz), 127.5 (d, *J* = 7.7 Hz), 127.6, 128.2, 128.7, 129.7, 134.0, 136.7, 140.0 (d, *J* = 2.9 Hz), 140.1 (d, *J* = 2.9 Hz), 159.0 (d, *J* = 242.4 Hz), 159.1, 162.3 (d, *J* = 244.4 Hz), 167.7, 167.8; <sup>19</sup>F NMR (CDCl<sub>3</sub>, 376 MHz) δ: -51.7–51.8 (1F, m), -54.9–55.0 (1F, m); MS *m/z*: 499 (M<sup>+</sup>); HRMS Calcd. for C<sub>31</sub>H<sub>27</sub>F<sub>2</sub>NO<sub>3</sub>: 499.196 (M<sup>+</sup>), Found: 499.196.

### *anti*-1-(4-Fluorophenyl)-3-(3-(4-fluorophenyl)-3-hydroxypropyl)-4-(4-hydroxyphenyl)azetidin-2-one [(±)-Ezetimibe]

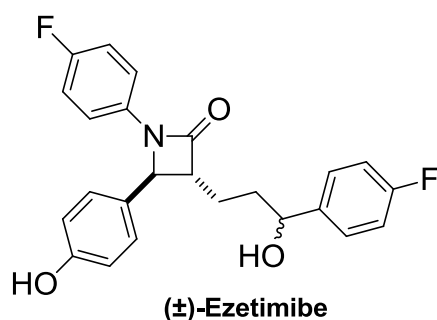

The title product ((±)-ezetimibe) was purified by column chromatography (AcOEt/hexane = 5:5) to give (±)-ezetimibe in 80% (65.5 mg) as a diastereomeric mixture.

(±)-ezetimibe: A colorless solid; <sup>1</sup>H NMR (DMSO-*d*<sub>6</sub>) δ: 1.59–1.86 (4H, m), 3.00–3.06 (1H, m), 4.42–4.53 (1H, m), 4.75–4.77 (1H, m), 5.23–5.24 (1H, m), 6.69–6.72 (2H, m),

7.05–7.13 (4H, m), 7.14–7.20 (4H, m), 7.23–7.31 (2H, m), 9.48 (1H, br);  $^{13}\text{C}$  NMR (100 MHz, DMSO- $d_6$ )  $\delta$ : 25.1, 36.9, 59.9, 60.0, 60.1, 71.6, 71.7, 115.2 (d,  $J = 20.2$  Hz), 116.2, 116.5, 118.8 (d,  $J = 7.5$  Hz), 128.1 (d,  $J = 13.4$  Hz), 128.1, 128.4 (d,  $J = 4.8$  Hz), 134.5, 142.6 (d,  $J = 4.8$  Hz), 142.7 (d,  $J = 5.7$  Hz), 158.0, 158.5 (d,  $J = 238.6$  Hz), 161.6 (d,  $J = 240.6$  Hz), 167.8, 167.9;  $^{19}\text{F}$  NMR ( $\text{CDCl}_3$ , 376 MHz)  $\delta$ : -55.4–55.5 (1F, m), -57.7–57.8 (1F, m); MS  $m/z$ : 409 ( $\text{M}^+$ ); HRMS Calcd. for  $\text{C}_{24}\text{H}_{21}\text{FNO}_3$ : 409.149 ( $\text{M}^+$ ), Found: 409.149.

### X-ray crystallographic analysis of *anti*-4Ai:

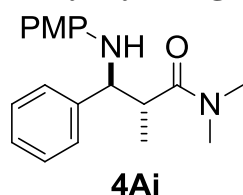

**4Ai**

The product was recrystallized from ethyl acetate/hexane. The single crystal was mounted on a glass fiber. All measurements were made on a Rigaku R-AXIS RAPID diffractometer using graphite monochromated CuK $\alpha$  ( $\lambda = 1.54187 \text{ \AA}$ ) radiation. The  $2\theta$  (max) value cut of  $136.5^\circ$ . The crystal structure was solved by the SIR2008 [3] direct methods and

refined by the full-matrix least squares using the program CRYSTALS [4]. The crystallographic data were summarized in the following table.

|                                         |                                                               |
|-----------------------------------------|---------------------------------------------------------------|
| empirical formula                       | C <sub>19</sub> H <sub>24</sub> N <sub>2</sub> O <sub>2</sub> |
| formula weight                          | 312.41                                                        |
| crystal system                          | monoclinic                                                    |
| space group                             | P 21/c                                                        |
| a, $\text{\AA}$                         | 12.6178(3)                                                    |
| b, $\text{\AA}$                         | 5.97519(16)                                                   |
| c, $\text{\AA}$                         | 23.2562(6)                                                    |
| $\beta$ , $^\circ$                      | 101.815(7)                                                    |
| V, $\text{\AA}^3$                       | 1716.23(9)                                                    |
| Z                                       | 4                                                             |
| $D_{\text{calc}}$ , g/cm <sup>3</sup>   | 1.209                                                         |
| T, $^\circ\text{C}$                     | 23                                                            |
| $\mu$ (CuK $\alpha$ ), cm <sup>-1</sup> | 6.25                                                          |
| No. of reflens measured                 | 17797                                                         |
| No. of reflens observed                 | 2672                                                          |
| No. of reflens variable                 | 232                                                           |
| R (All reflections)                     | 0.0459                                                        |
| R <sub>w</sub> (All reflections)        | 0.0571                                                        |
| Good of Fit                             | 1.364                                                         |
| Max Shift/Error                         | 0.001                                                         |

The crystal structure has been deposited at the Cambridge Crystallographic Data Centre (CCDC 1431128). The data can be obtained free of charge via the Internet at [www.ccdc.cam.ac.uk/conts/retrieving.html](http://www.ccdc.cam.ac.uk/conts/retrieving.html).



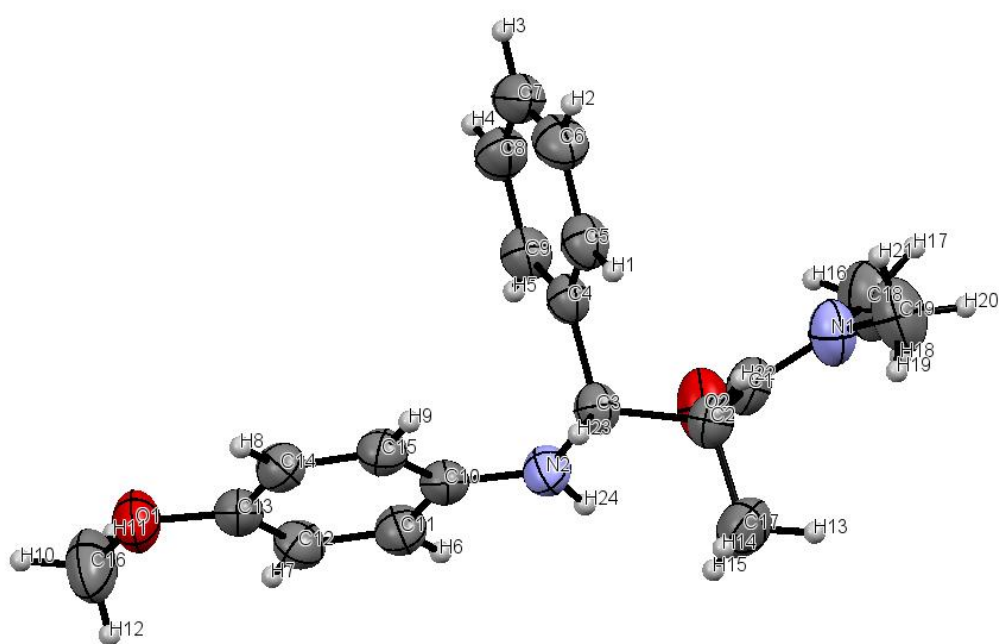

**References:**

- 1) Isoda, M.; Sato, K.; Funakoshi, M.; Omote, M.; Tarui, A.; Omote, M.; Ando, A. *J. Org. Chem.* **2015**, *80*, 8398–8405.
- 2) Sato, K.; Isoda, M.; Ohata, S.; Morita, S.; Tarui, A.; Omote, M.; Kumadaki, I.; Ando, A. *Adv. Synth. Catal.* **2012**, *354*, 510–514.
- 3) SIR2008: M.C. Burla, R. Caliandro, M. Camalli, B. Carrozzini, G.L. Cascarano, L. De Caro, C. Giacovazzo, G. Polidori, D. Siliqi, R. Spagna (2007).
- 4) Carruthers, J.R., Rollett, J.S., Betteridge, P.W., Kinna, D., Pearce, L., Larsen, A., and Gabe, E. (1999) CRYSTALS Issue 11, Chemical Crystallography Laboratory, Oxford, UK.

syn-3Ab  
<sup>1</sup>H NMR

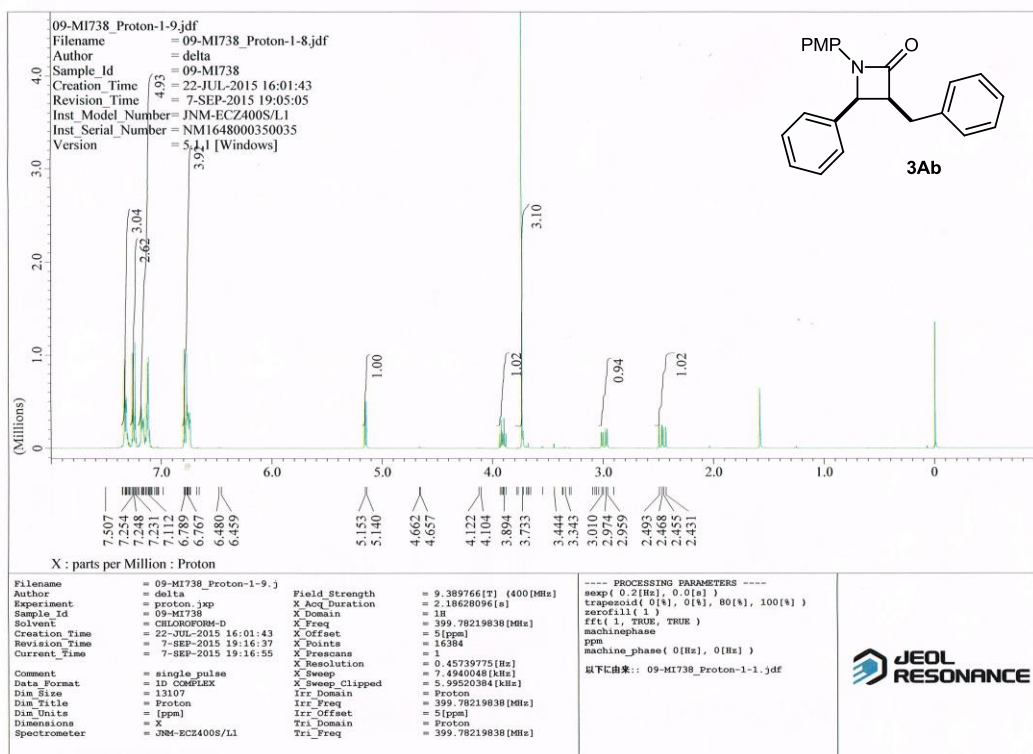

<sup>13</sup>C NMR

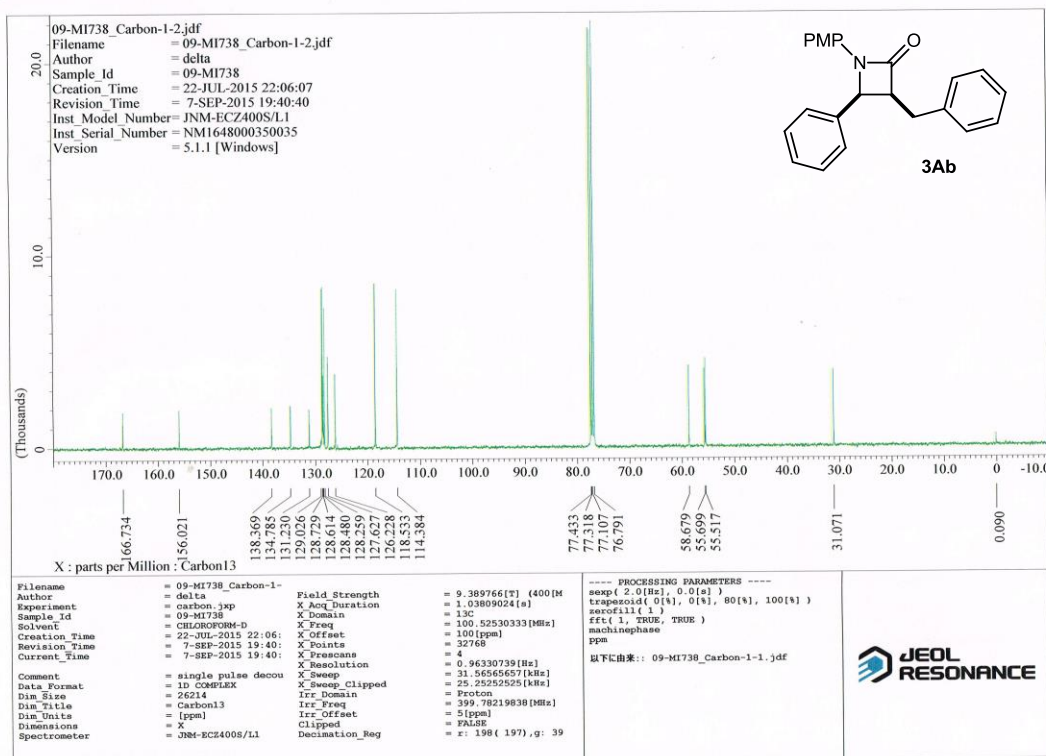

syn-3Ae  
<sup>1</sup>H NMR

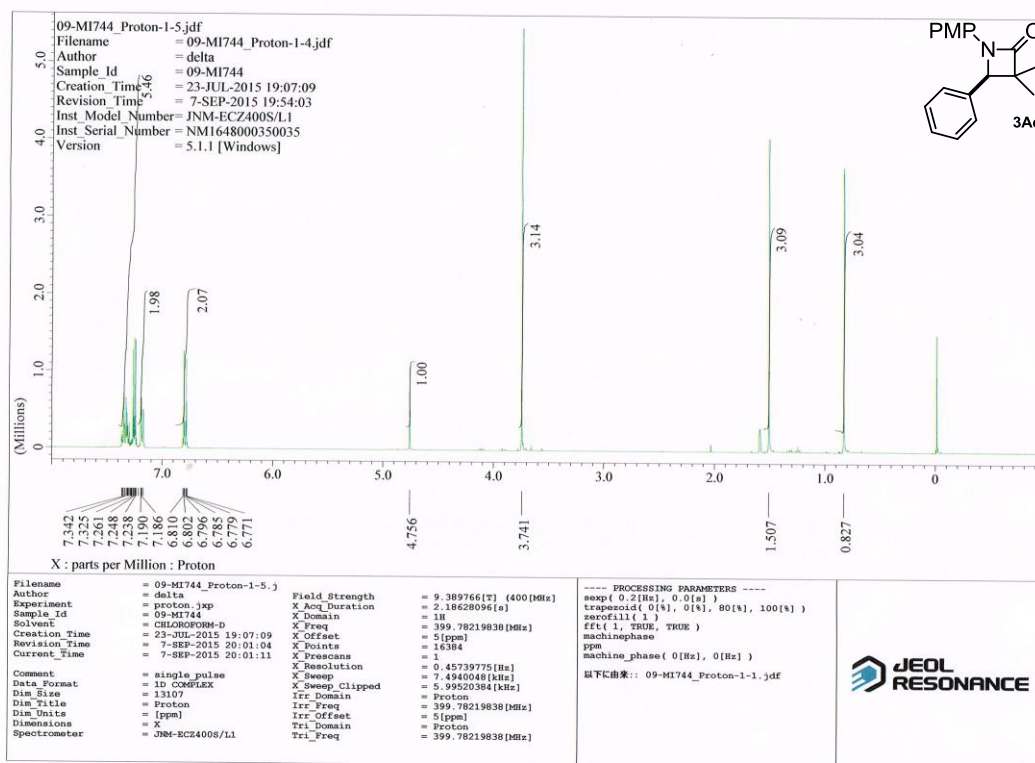

<sup>13</sup>C NMR

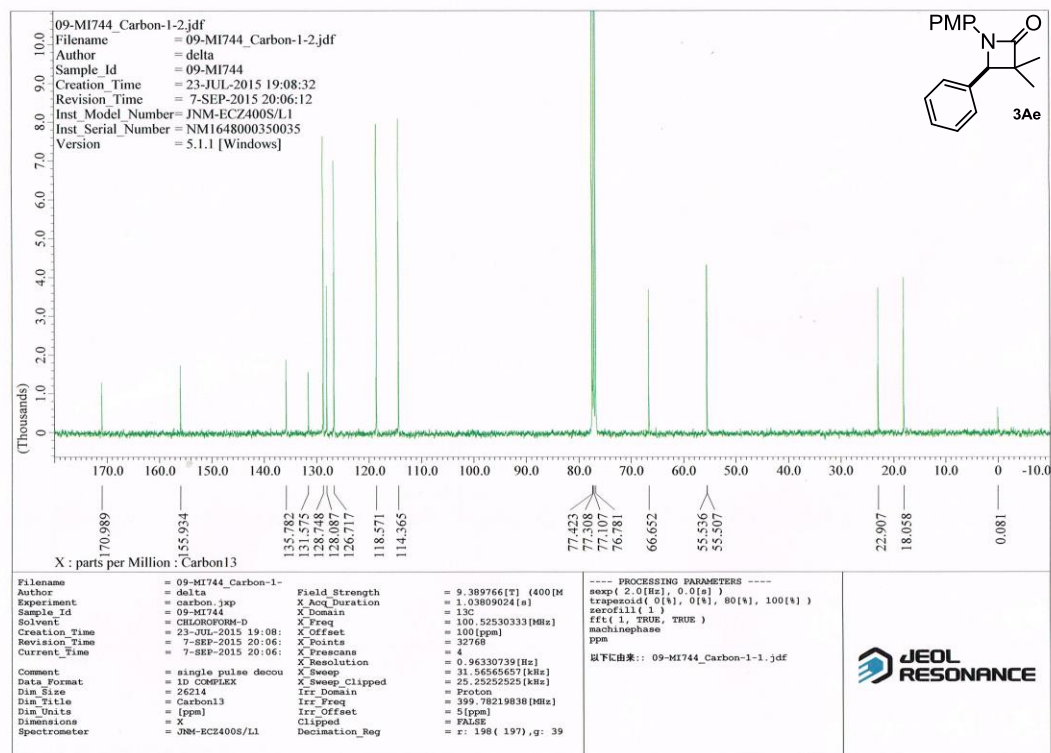

# anti-3Ag

## <sup>1</sup>H NMR

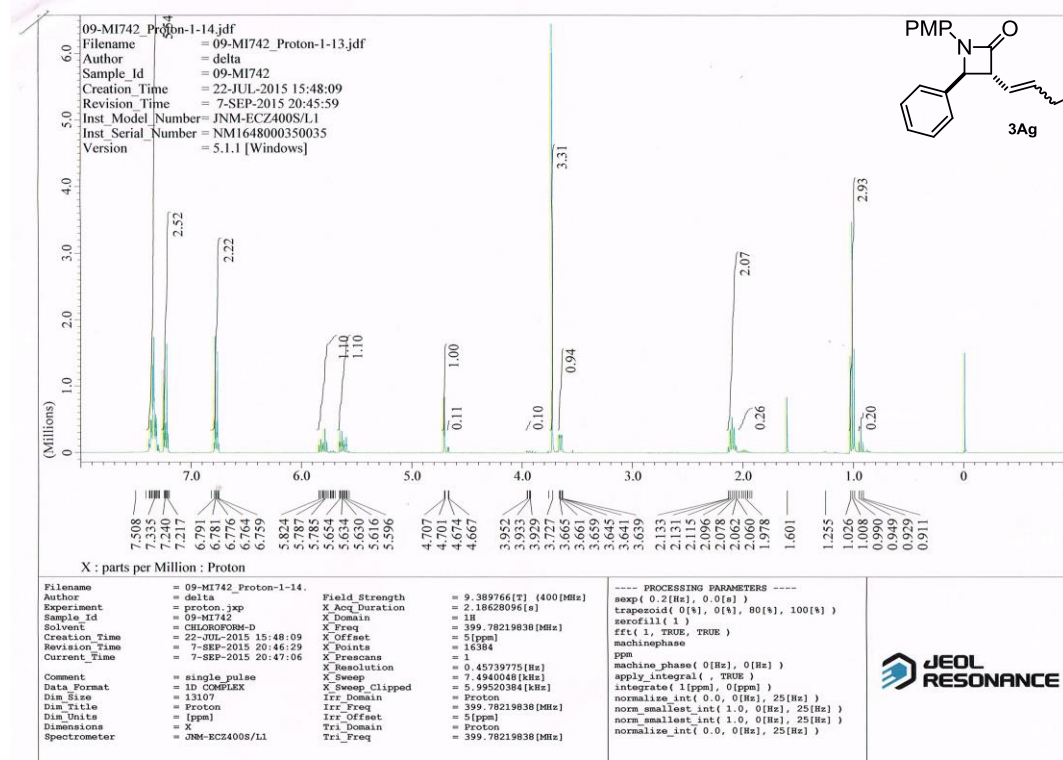

## <sup>13</sup>C NMR

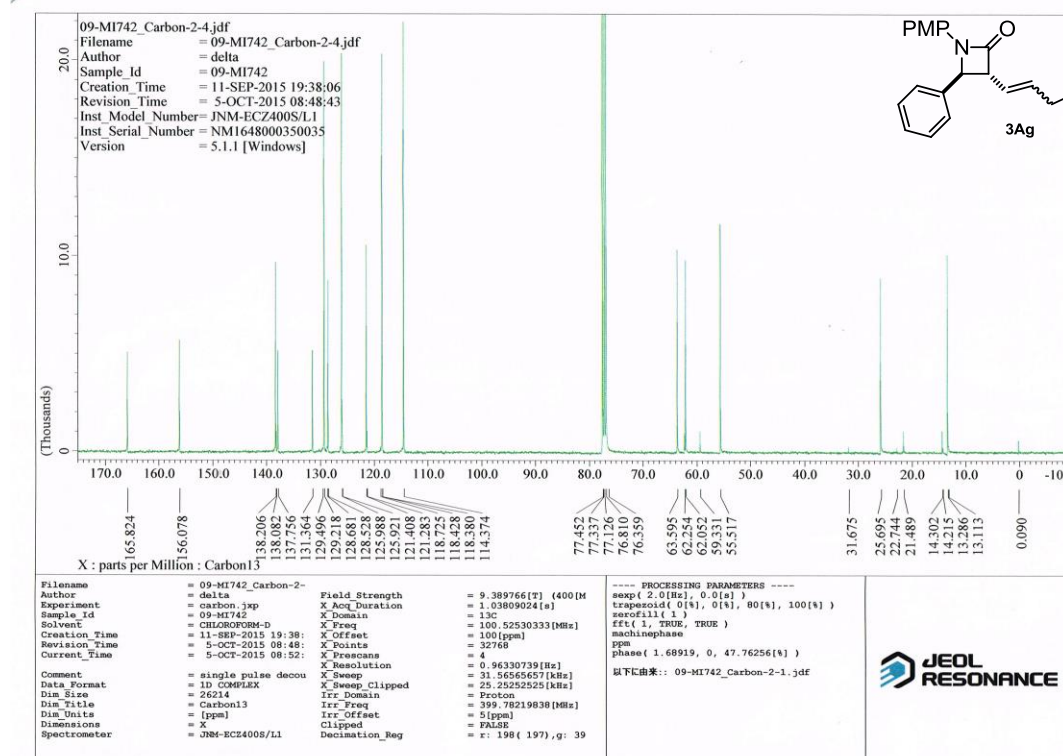

syn-4Ai  
<sup>1</sup>H NMR

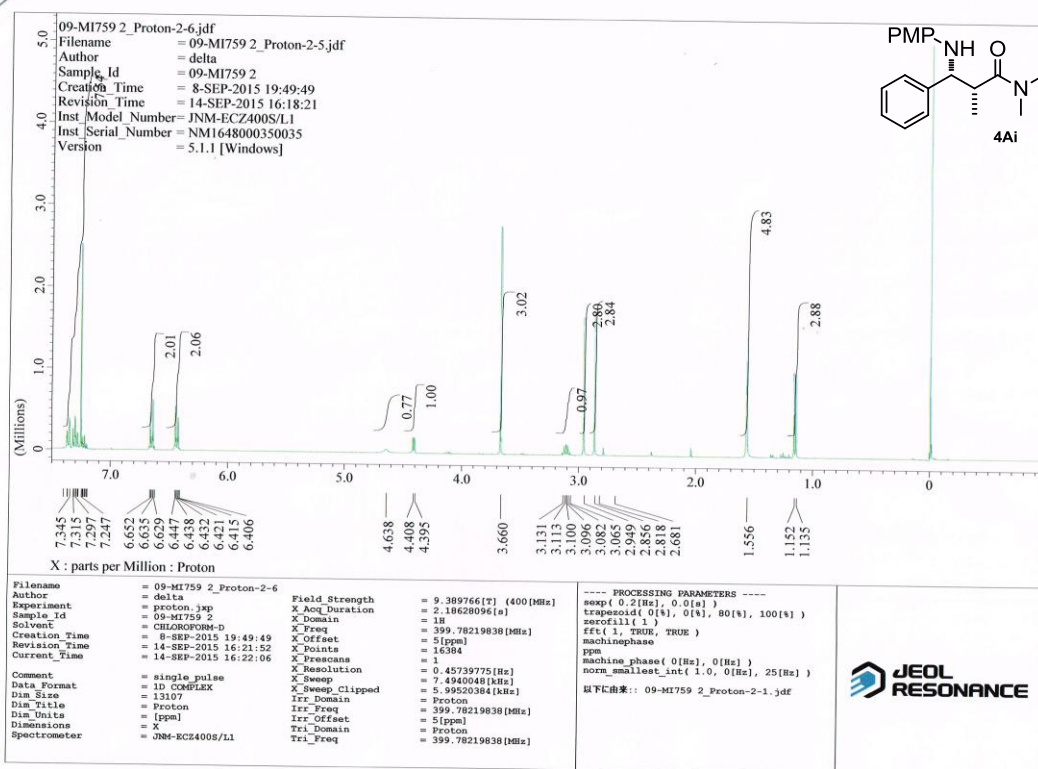

<sup>13</sup>C NMR

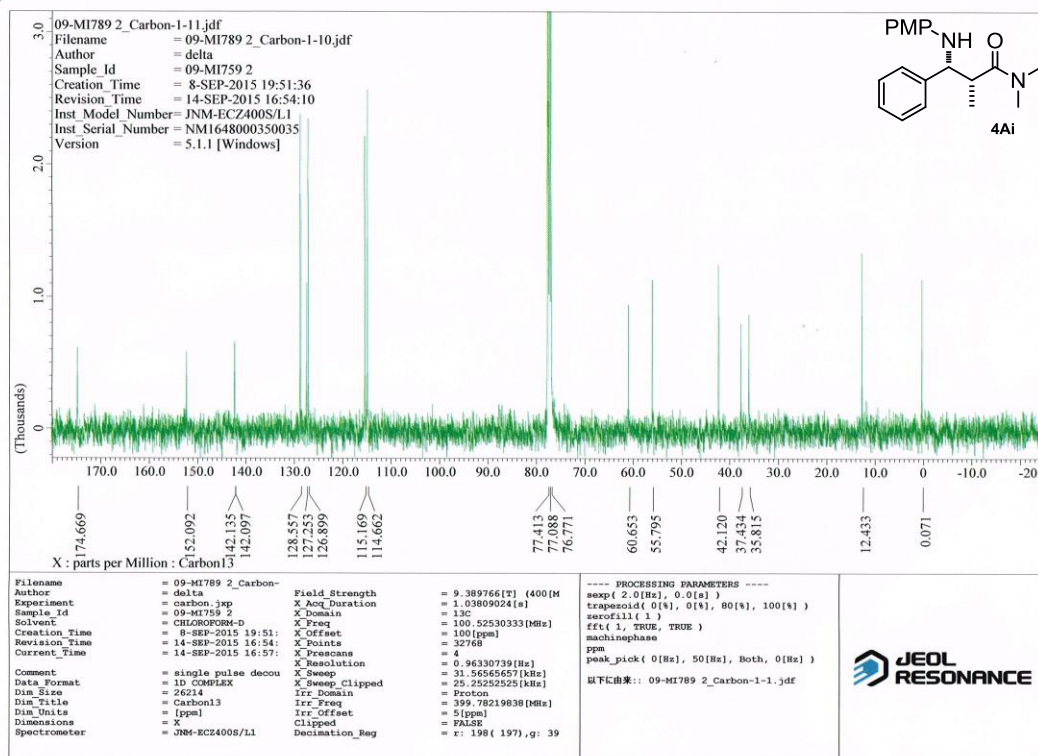

anti-4Ai

<sup>1</sup>H NMR

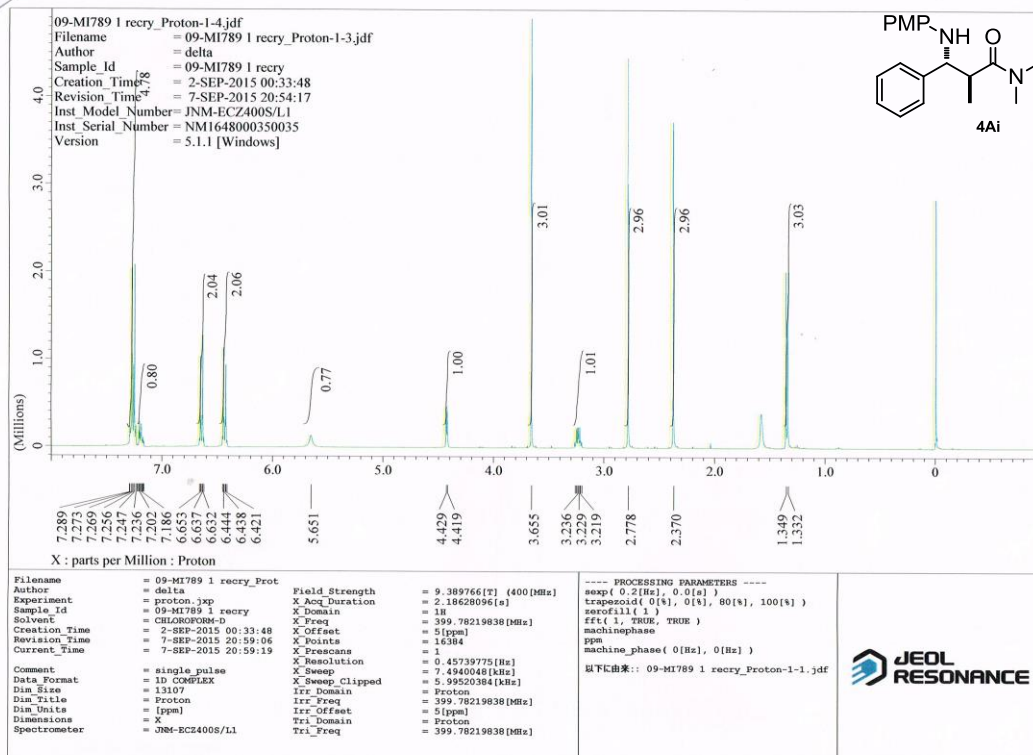

<sup>13</sup>C NMR

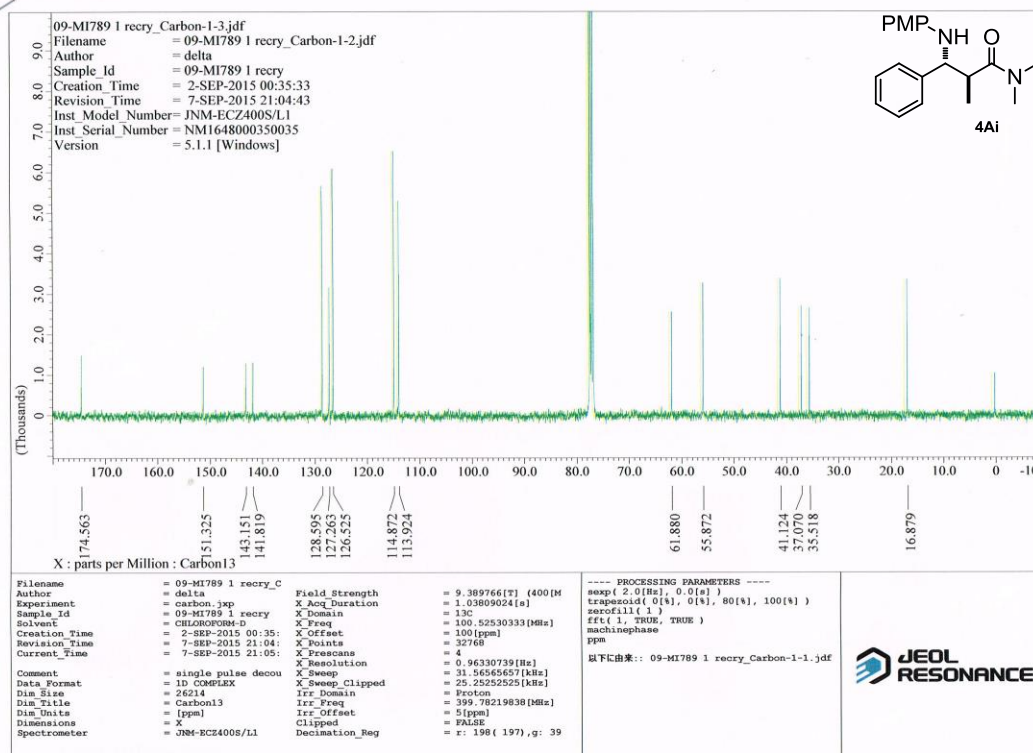

anti-3Bh

<sup>1</sup>H NMR

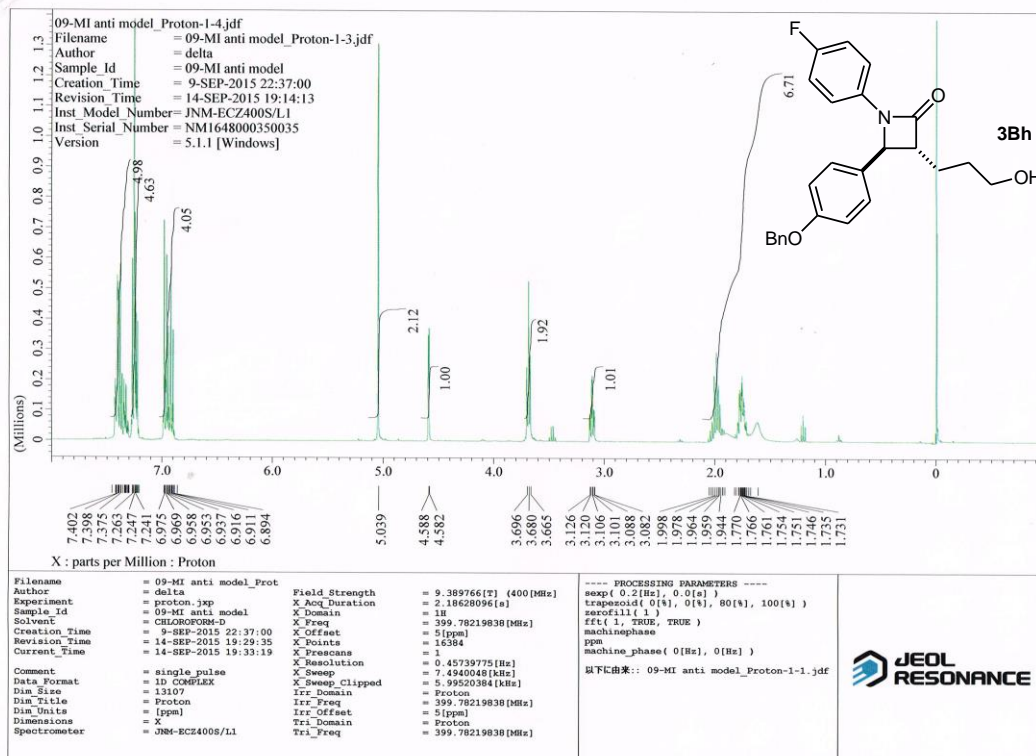

<sup>13</sup>C NMR

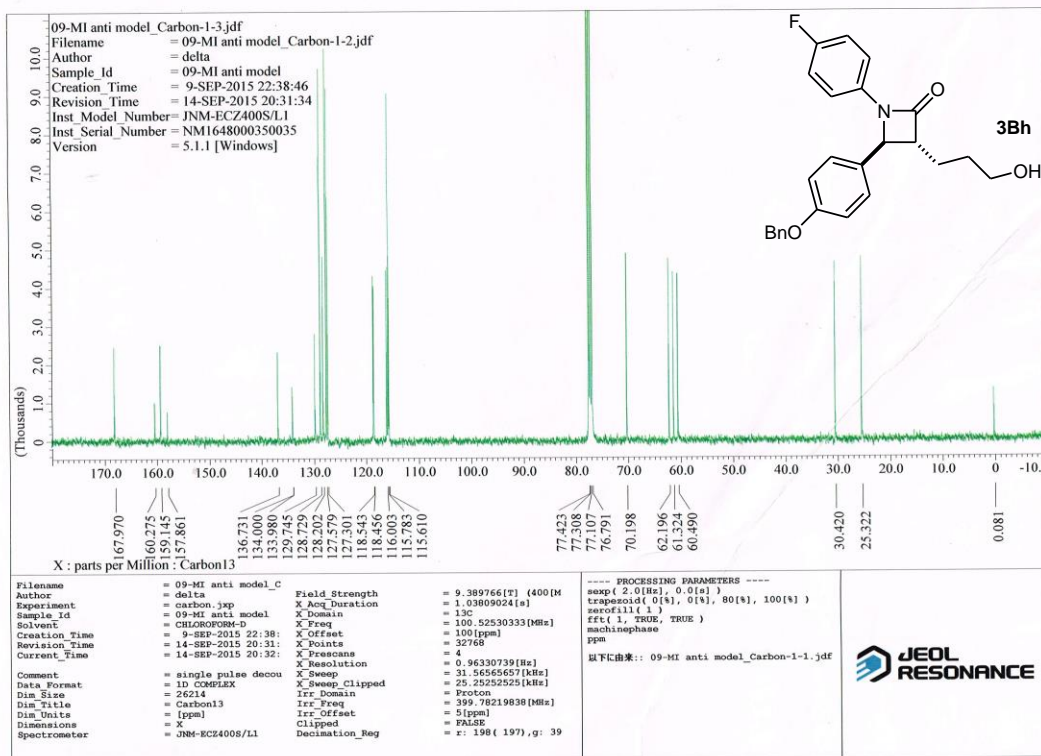



anti-3Bj  
<sup>1</sup>H NMR

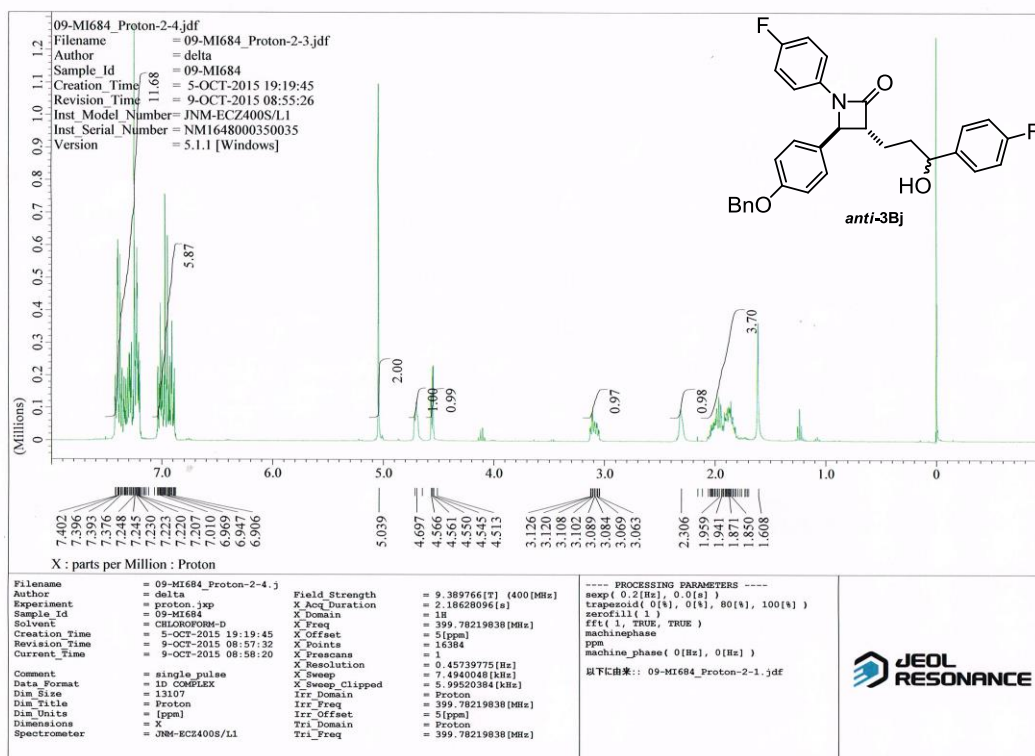

<sup>13</sup>C NMR

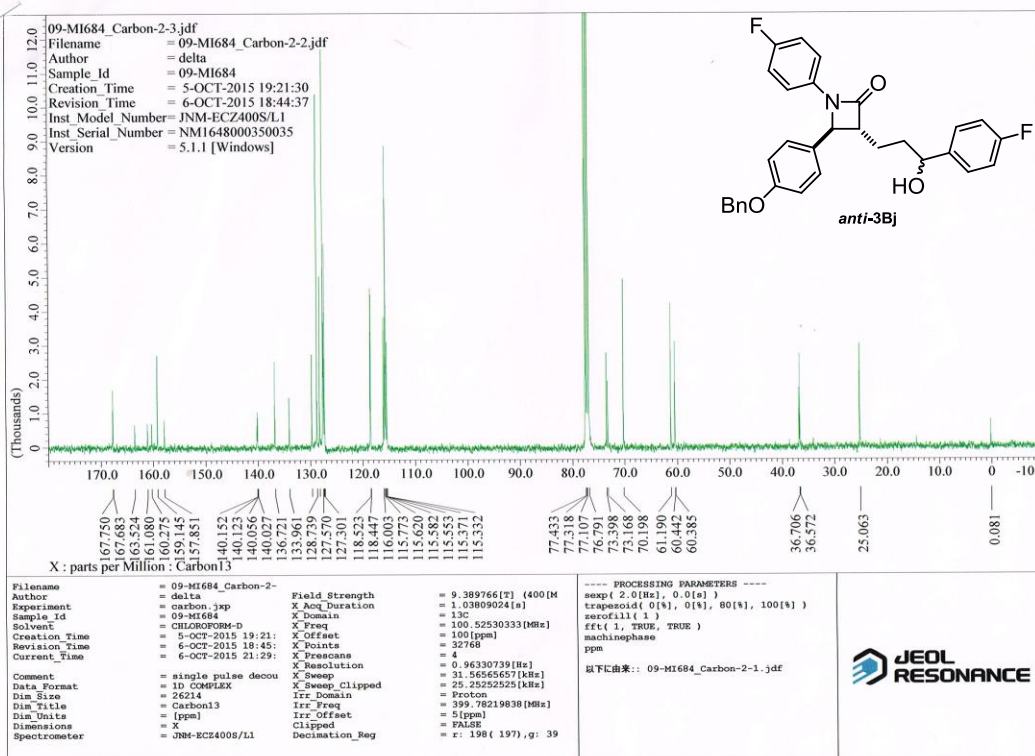

# (±)-Ezetimibe

## <sup>1</sup>H NMR

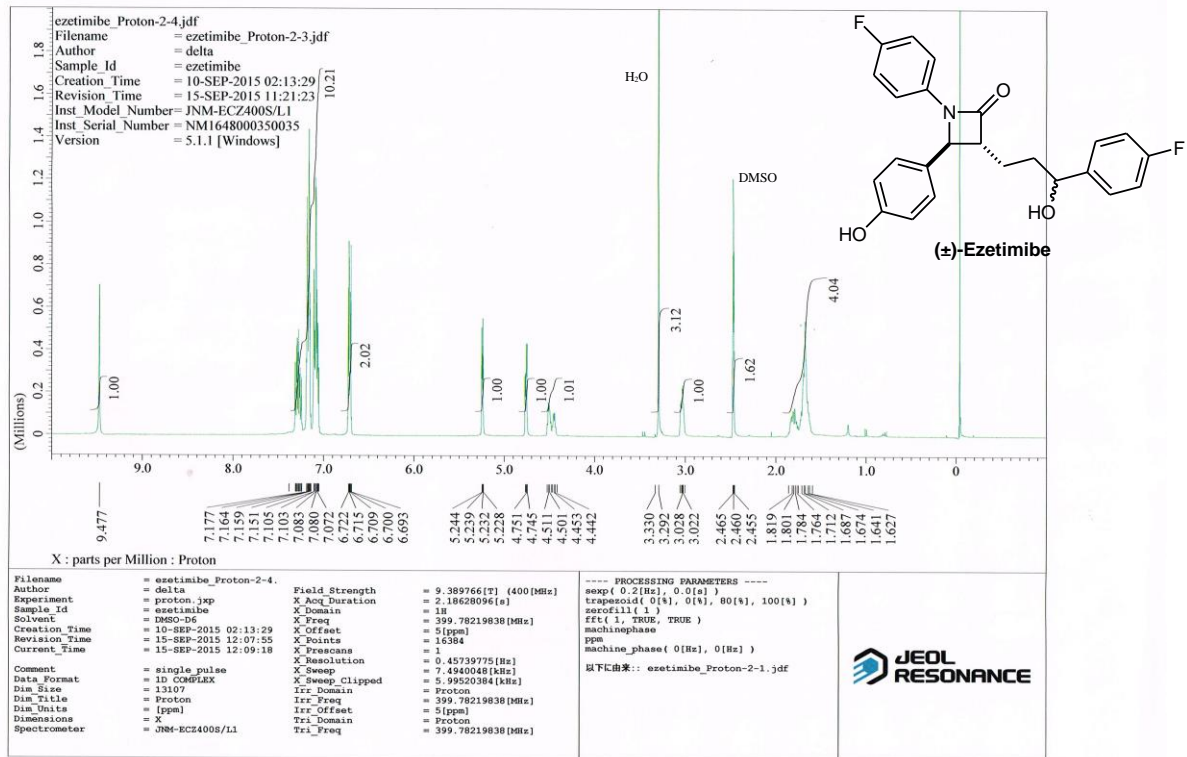

## <sup>13</sup>C NMR

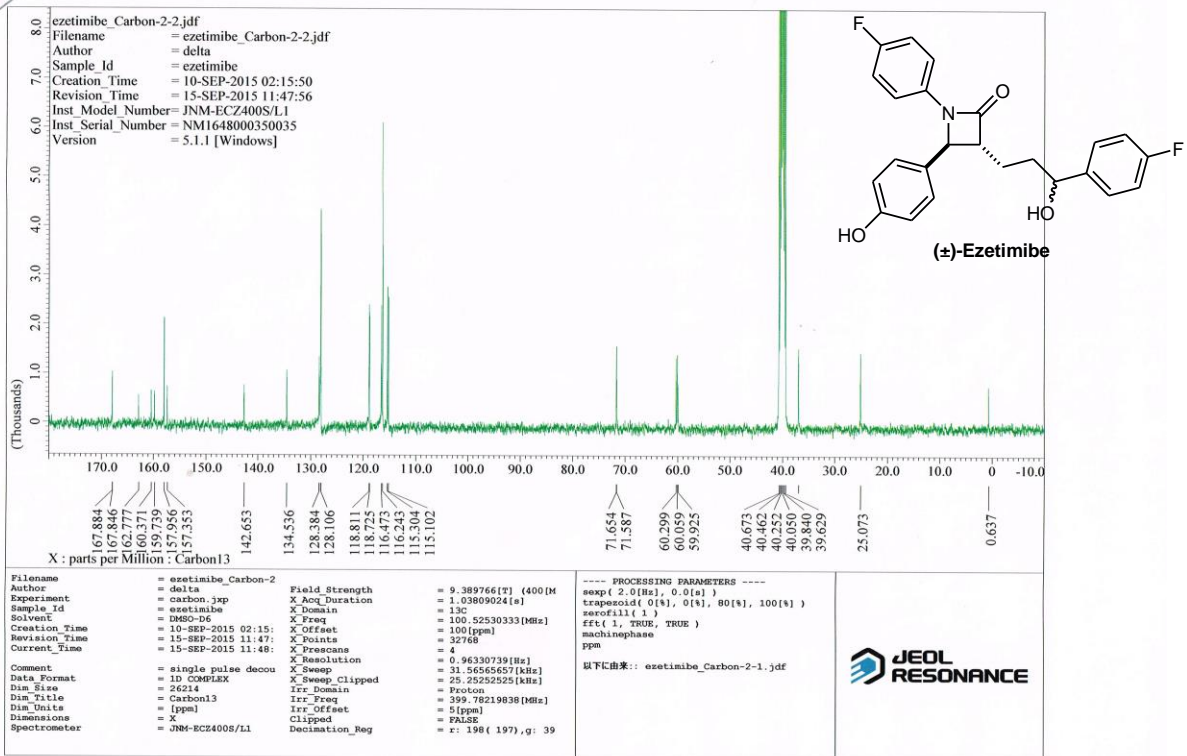

Supplement: Beilstein_J_Org_Chem-12-1608-s001.pdf [file Beilstein_J_Org_Chem-12-1608-s001.pdf]
